# Supplementary material for: Evidence for the utility of cfDNA plasma concentrations to predict disease severity in COVID-19: a retrospective pilot study
Source: PeerJ. 2023 Sep 18;11:e16072. doi: 10.7717/peerj.16072 (PMC10512938; doi:10.7717/peerj.16072)
Supplement: Supplemental Information 2 — The patients’ laboratory parameters, comorbidities, duration of hospital- and ICU-stay and cfDNA measurements. [file peerj-11-16072-s002.xlsx]

## Sheet: Tabelle1
Patient-ID	Age	Genger	Sample-ID	date of blood sampling	Aliquots	cfDNA	min. CRP (mg/l) during hospitalization	time interval (d) to cfDNA measurement	CRP (mg/l) on day of cfDNA sampling	max. CRP (mg/l) during hospitalization	time interval (d) to cfDNA measurement	min. LDH (U/l) during hospitalization	time interval (d) to cfDNA measurement	LDH (U/l) on day of cfDNA sampling	max. LDH (U/I) during hospitalization	time interval (d) to cfDNA measurement	min. PCT (ng/ml) during hospitalization	time interval (d) to cfDNA measurement	PCT (ng/ml) on day of cfDNA sampling	max. PCT (ng/ml) during hospitalization	time interval (d) to cfDNA measurement	min. Creatinine (mg/dl) during hospitalization	time interval (d) to cfDNA measurement	Creatinine (mg/dl) on day of cfDNA sampling	max. Creatinine (mg/dl) during hospitalization	time interval (d) to cfDNA measurement	min. Urea (mg/dl) during hospitalization	time interval (d) to cfDNA measurement	Urea (mg/dl) on day of cfDNA sampling	max. Urea (mg/dl) during hospitalization	time interval (d) to cfDNA measurement	min. eGFR (ml/min./1,73qm) during hospitalization	time interval (d) to cfDNA measurement	eGFR (ml/min./1,73qm) on day of cfDNA sampling	max. eGFR (ml/min./1,73qm) during hospitalization	time interval (d) to cfDNA measurement	min. Bilirubin (mg/dl) during hospitalization	time interval (d) to cfDNA measurement	Bilirubin (mg/dl) on day of cfDNA sampling	max. Bilirubin (mg/dl) during hospitalization	time interval (d) to cfDNA measurement	min. D-Dimer (mg/l) during hospitalization	time interval (d) to cfDNA measurement	D-Dimer (mg/l) on day of cfDNA sampling ± 3 d	max. D-Dimer (mg/l) during hospitalization	time interval (d) to cfDNA measurement	Interleukin 6 (pg/ml) on day of cfDNA sampling	min. CK (U/l) during hospitalization	time interval (d) to cfDNA measurement
1	53	F	#1	2020-04-21	2020-04-22	2935.99	13	-22	55	530	-26	364	+17'		647	-3	0.09	-15		208	-11	0.6	-17	2.49	3.23	-1	4	-28	66	103	-2	16	-2	21	104	-17	0.3	-13	0.8	2.6	-8	0.66	-32		21.48	-27		< 7	+14'
2	55	M	#2	2020-04-20	2020-04-22	1810.43	43	+18'	191	568	-15	433	-24	537	832	-18	0.1	+16'	1.1	7.6	-15	1.09	+21'	4.86	7.01	-11	15	+21'	85	89	+6'	8	-9	12	68	+17'	1	+21'	2.2	5.1	-13	1.71	-24	1.93	17.64	-13		41	-14
3	75	M	#3	2020-04-17	2020-04-22	4143.85	56	-22	348	348	0	267	-21		508	-13	0.06	-3	1.2	1.2	0	0.66	-9	2.2	2.2	0	14	-21	81	81	0	28	0	28	94	-9	0.7	-19	2.7	2.7	0	2.46	-18	11.37	12.01	-21		370	-11
4	64	M	#4	2020-04-20	2020-04-22	1186.06	0.73	+35'	69	397	-16	188	+27'	318	629	-20	0.17	+27'		5.8	-9	1.97	-4	3.29	7.63	+8'	29	-1	48	90	+8'	7	+6'	19	35	-4	0.3	+27'	2.7	3.3	-3	0.8	+25'		5.05	-12		<7	+15'
5	39	F	#5	2020-04-20	2020-04-22	697.78	13	0	13	385	-18	250	-1	301	720	-10	0.08	0	0.08	0.71	-17	0.32	-1	0.38	0.71	-17	6	-18	22	22	0	108	-17	134	142	-1	0.9	-1	1.1	3.9	-17	0.96	-9		3.66	-12		<7	-19
6	72	M	#6	2020-04-21	2020-04-22	1044.24	5.4	+1'	8.7	244	-18	338	+10'		471	-8	0.07	+6'		0.54	-8	0.58	+4'	0.72	1.12	-7	7	+16'	28	50	-7	65	-7	93	102	+4'	0.4	-2	0.6	1.4	-13	3.56	-18		5.16	-8		12	+8'
7	54	M	#7	2020-04-20	2020-04-22	3106.87	9.6	+5'	62	356	-16	447	-19	771	1566	-5	0.09	-7	0.4	0.68	-1	0.74	-7	0.9	1.91	-14	13	-17	25	46	-4	39	-14	97	105	-7	0.3	+4'	0.6	0.7	-8	1.5	-19	2.34	16.82	-15		28	-19
8	73	M	#8	2020-04-21	2020-04-22	876	95	-3	212	413	-18	380	+16'	538	705	-15	0.43	+18'		4.9	-15	1.85	-4	4.15	7.24	+11'	31	+15'	73	84	-18	7	+9'	13	35	-4	0.9	-9	2.2	3.2	+7'	1.66	-14		2.65	-19		25	+16'
9	82	M	#9	2020-04-21	2020-04-22	374.18	4.2	-7	36	46	-18	188	-18		235	-17	0.05	-2		0.08	-18	2.32	-4	3.27	3.87	-2	32	-20	41	63	-15	14	-1	17	25	-4	0.3	-5	0.4	0.5	-1	0.8	-23		1.05	-18		98	-10
10	79	F	#10	2020-04-20	2020-04-22	2041.16	43	+8'	65	254	-16	248	-15	483	544	-8	0.15	+8'		3.9	-16	1.78	-15	3.48	4.34	-11	17	-6	42	57	-11	9	-11	12	27	-15	0.6	0	0.6	1.2	-16	13.54	-16		28.69	-15		107	-14
11	72	M	#11	2020-04-21	2020-04-22	2358.06	13	+35'	177	302	-10	248	+11'	380	530	-14	0.12	+32'		1	+4'	0.63	+29'	1.26	2.53	+4'	24	+10'	79	106	+4'	24	+4'	57	98	+31'	0.4	-12	2.1	2.5	-1	0.32	-14		1.36	-5		14	+30'
12	77	M	#12	2020-04-21	2020-04-22	6346.25	63	-10	108	176	-4	1214	-11		1849	-2	5	+1'		7	-4	0.96	-11	1.11	1.5	+4'	26	-7	36	50	+4'	56	+3'	64	76	-11	0.9	-13	1.3	1.9	+3'	5.09	-13		7.07	-2		124	-13
13	79	F	#13	2020-04-20	2020-04-22	2395.19	11	0	11	48	-5	238	-5		534	-7	0.02	-4	0.03	0.04	-6	0.43	-7	0.62	0.65	-3	<3	-4	7	7	0	85	-3	86	97	-7	0.3	-3	0.4	0.6	-7				1.09	-6		101	-5
14	70	F	#14	2020-04-16	2020-04-22	2193.4	23	+4'	56	61	+1'	432	+1'	480	480	0	<0,02	+4'	0.02	0.03	+1'	0.68	0	0.68	0.87	+1'	8	+1'	12	12	0	68	+1'	89	89	0	0.5	+4'	0.6	0.7	+1'				1	+1'		80	+1'
15	59	M	#15	2020-04-18	2020-04-22	1906.05	25	+13'	174	200	+4'	382	0	382	755	+8'	0.12	+14'	0.39	0.39	0	0.92	+12'	2.24	2.24	0	26	+16'	100	100	0	31	0	31	91	+16'	0.4	+11'	1.2	2	+1'	3.39	0	3.39	5.08	+14'		34	+11'
16	35	F	#16	2020-04-19	2020-04-22	563.44	10	0	10	118	+2'	329	+1'	648	648	0				0.03	+1'	0.44	0	0.44	0.57	+1'	8	+2'	9	9	0	120	+1'	131	131	0	0.5	0	0.5	0.7	+1'				1.12	+1'		135	+1'
17	100	F	#17	2020-04-19	2020-04-22	1043.47	8.1	0	8.1	89	+8'			315	315	0	0.16	+16'	0.35	0.35	0	0.81	+11'	1.2	1.3	+1'	18	+4'	21	24	+1'	37	0	37	60	+11'	0.2	+4'	0.4	0.8	+16'
18	40	F	#18	2020-04-20	2020-04-22	516.41	20	0	32	54	+1'	399	0	435	435	0	<0,02	+2'	0.02	0.02	0	0.56	+2'	0.58	0.68	0	5	+2'	6	6	0	110	0	116	117	+2'	0.5	0	0.5	0.7	+1'			0.55	0.55	0	50	73	0
19	65	M	#19	2020-04-19	2020-04-22	762.67	96	+2'	99	105	+1'	337	0	337	415	+2'			0.06	0.06	0	0.87	+2'	0.96	1.21	+1'	15	0	15	17	+1'	82	0	82	86	+2'	0.6	0	0.6	0.9	+1'			1.95	1.95	0	52	332	+2'
20	81	F	#20	2020-05-22	2020-05-22	247.533	0.69	-38	5.5	132	-34	232	-31	242	381	-23	0.04	-13		0.12	-23	0.44	+3'	0.48	0.74	-38	9	+11'	13	27	-23	76	-38	92	95	+3'	0.3	+3'		0.7	-17				16.66	-23		28	-23
21	95	M	#21	2020-05-18	2020-05-22	1758.84	21	-4	51	123	-3	363	-3		864	-4	0.03	-4	0.08	0.32	-3	0.51	+2'	0.6	0.71	-4	6	0	6	22	-4	80	-4		91	+2'	0.4	-4	0.7	0.8	-3	1.4	-3		1.74	-4		42	-4
21	95	M	#22	2020-05-20	2020-05-22	1580.24	21	-6	28	123	-5	363	-5	369	864	-6	0.03	-6		0.32	-5	0.51	0	0.51	0.71	-6	6	-2		22	-6	80	-6	91	91	0	0.4	-6	0.7	0.8	-5	1.4	-5		1.74	-6		42	-6
[truncated: 70 more columns]
